# Supplementary material
Source: publisher site journal article supplement (https://www.dovepress.com/article/463633)
Supplement: Supplementary file 1 [file get_supplementary_file.php]

**Supplementary Table 1.** Time evolution of the semi-quantitative mean sum synovitis scores (standard deviation) assigned from each imaging modality, based on analyses of all joints (ad hoc) and the two most affected joints (post hoc).

| Timepoint | Ad hoc analysis of all joints (N=10) |                  |                  |            |           |           | Post hoc analysis of the two most affected joints (N=8) |           |           |           |
|-----------|--------------------------------------|------------------|------------------|------------|-----------|-----------|---------------------------------------------------------|-----------|-----------|-----------|
|           | MRI <sup>a</sup>                     | MRI <sup>b</sup> | MRI <sup>c</sup> | GS-US      | PD-US     | FOI       | MRI                                                     | GS-US     | PD-US     | FOI       |
| Baseline  | 5.4 (4.2)                            | 5.6 (4.5)        | 5.9 (4.3)        | 18.0 (4.1) | 3.1 (1.9) | 5.1 (6.1) | 4.0 (1.8)                                               | 6.8 (1.6) | 2.6 (0.7) | 3.8 (1.3) |
| Day 8     | 5.2 (4.0)                            | 5.3 (4.5)        | 5.7 (4.2)        | 16.6 (5.3) | 2.1 (1.9) | 4.4 (4.2) | 3.9 (2.0)                                               | 6.1 (2.4) | 1.3 (1.3) | 3.0 (0.9) |
| Day 15    | 5.3 (4.2)                            | 5.4 (4.6)        | 5.8 (4.3)        | 17.6 (2.5) | 2.7 (1.6) | 4.1 (4.1) | 3.8 (2.2)                                               | 5.9 (1.4) | 1.5 (0.9) | 2.5 (1.0) |

*MRI<sup>a</sup>, MRI<sup>b</sup>, MRI<sup>c</sup>: scores calculated using three different approaches to missing Baseline CMC1 data for two patients (for details, see main text, Section Imaging-assessed synovitis). Sum score ranges for a single joint: MRI, 0-3; GS-US and PD-US, 0-6; FOI, 0-3.*
